# Supplementary material
Source: Springer Nature journal article supplement (https://www.springermedizin.de/resource/supplementary/12906_2012_1251_MOESM8_ESM.pdf/9520040)

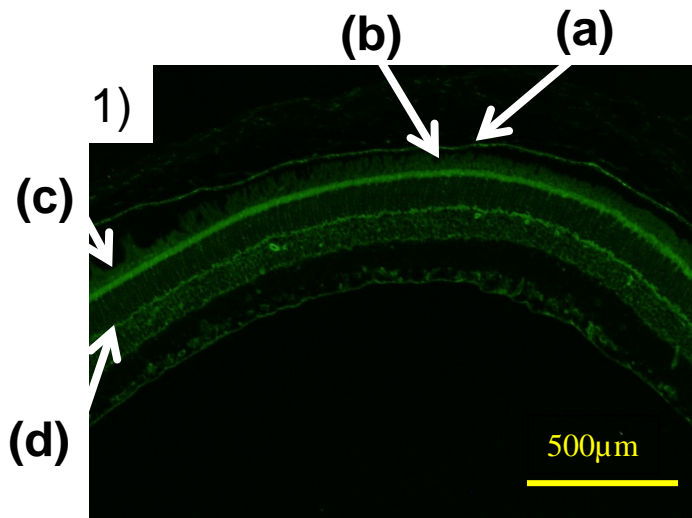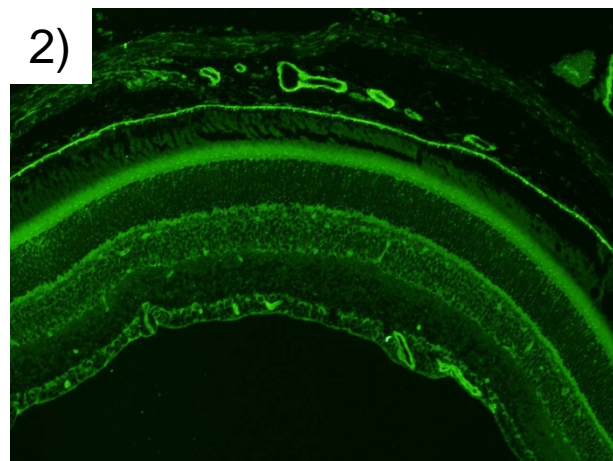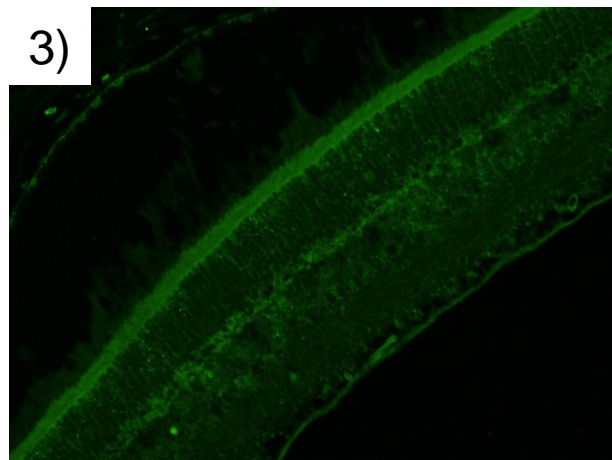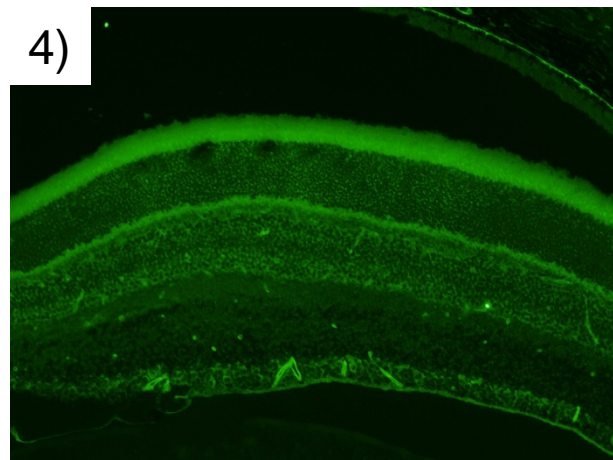

Supplement: MOESM8 [file 9520040]
